# Supplementary material for: Multi-energetic group synergy driven design and synthesis of [1,2,4]triazolo[5,1-c][1,2,4]triazine-fused energetic compounds
Source: Royal Society of Chemistry journal article supplement (doi:10.1039/d2qm01321e), 2023-01-01
Supplement: d2qm01321e1.pdf [file d2qm01321e1.pdf]

## Supporting Information (SI)

### Multi-energetic groups synergies driven design and synthesis of [1,2,4] triazolo [5,1-c] [1,2,4] triazine fused energetic compounds

Yubing Liu<sup>ab</sup>, Jie Li<sup>ab</sup> Xun Zhang<sup>ab</sup>, Chunlin He<sup>\*abcd</sup> and Siping Pang<sup>\*a</sup>

<sup>a</sup>School of Materials Science & Engineering, Beijing Institute of Technology, Beijing 100081, China.

<sup>b</sup>Experimental Center of Advanced Materials, School of Materials Science & Engineering, Beijing Institute of Technology, Beijing 100081, China.

<sup>c</sup>Yangtze Delta Region Academy of Beijing Institute of Technology, Jiaxing 314019, China.

<sup>d</sup>Chongqing Innovation Center, Beijing Institute of Technology, Chongqing 401120, China.

\*Email: [chunlinhe@bit.edu.cn](mailto:chunlinhe@bit.edu.cn), [pangsp@bit.edu.cn](mailto:pangsp@bit.edu.cn)

### Table of Contents

|                                         |     |
|-----------------------------------------|-----|
| 1. Experimental Sections .....          | S2  |
| 2. Theoretical calculation.....         | S2  |
| 3. X-ray Crystallographic Datas .....   | S3  |
| 4. Spectrums for all new compounds..... | S10 |
| 5. HRMS spectrum for 6-13 .....         | S17 |
| 6. IR spectra of all new compounds..... | S19 |
| 7. DSC plots for 6-13.....              | S23 |
| References.....                         | S26 |

## 1. Experimental Sections

### 1.1 Safety Precaution

In this work, all new compounds are potential energetic materials that tend to explode under certain external stimuli. Therefore, the whole experimental process should be carried out by using proper safety equipment, such as safety shields, eye protection, and leather gloves.

### 1.2 General methods

<sup>1</sup>H NMR, <sup>13</sup>C NMR and <sup>15</sup>N NMR spectra were recorded at 25 °C on a Bruker 400 MHz, 100 MHz and 40 MHz, respectively, and TMS as internal standard. Chemical shifts were reported in parts per million (ppm). The onset decomposition temperature was measured using a TA Instruments DSC25 differential scanning calorimeter at a heating rate of 5 °C min<sup>-1</sup> under dry nitrogen atmosphere. Infrared spectra (IR) were obtained on a PerkinElmer Spectrum BX FT-IR instrument equipped with an ATR unit at 25 °C. Elemental analyses of C/H/N were investigated on a Vario EL III Analyzer. Impact and friction sensitivities were tested by a BAM fallhammer and friction tester. Densities were determined at room temperature by employing a Micromeritics AccuPyc 1340 gas pycnometer. X-ray diffractions of all single crystals were carried out on a Bruker D8 VENTURE diffractometer using Mo-K $\alpha$  radiation ( $\lambda = 0.71073 \text{ \AA}$ ).

## 2. Theoretical calculation

The calculation of the heats of formation were carried out using Gaussian 09 (Revision E.01) suite of programs. All the compounds were determined using isodesmic reactions (**Scheme S1**). The geometric optimization and frequency analyses of the structures were calculated using B3LYP/6-311++G\*\* level, and the single energy points were calculated at the M062X/de2tzvpp level. The heats of formation for complex structures were obtained by atomization using G2 ab initio method.<sup>1</sup> The enthalpy of sublimation was calculated by using Trouton's rule.<sup>2</sup> Solid state heats of formation of the resulting compounds were calculated with equation (1) in which  $T_{m/d}$  is the melting temperature or decomposition temperature.

$$\Delta H_{f(solid)} = \Delta H_{f(g)} - \Delta H_{sub} = \Delta H_{f(g)} - 188[J mol^{-1} K^{-1}] * T_{m/d} \quad (1)$$

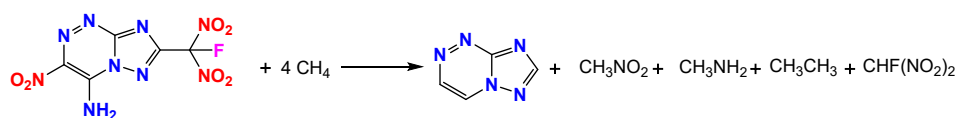

8

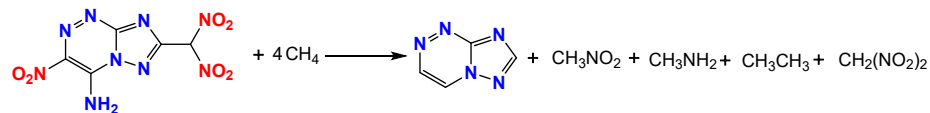

9

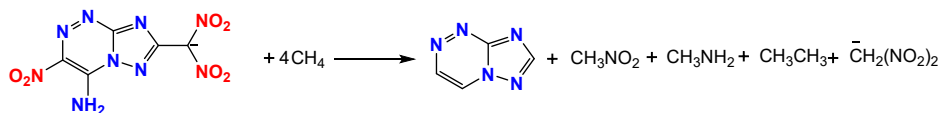

anion of 6, 10-12

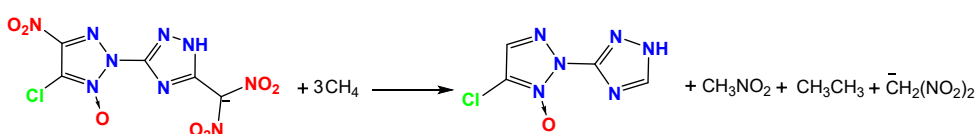

anion of 7, 13

Scheme S1. Isodesmic reactions.

### 3. X-ray Crystallographic Datas

Table S1. Crystal data, data collection, and refinement for **2**, **3** and **4**

|                               | <b>2</b> ·MeOH·CD <sub>3</sub> CN                                              | <b>3</b> ·3 DMF                                                | <b>4</b>                                                      |
|-------------------------------|--------------------------------------------------------------------------------|----------------------------------------------------------------|---------------------------------------------------------------|
| CCDC No.                      | 2151871                                                                        | 215273                                                         | 2151872                                                       |
| Empirical Formula             | C <sub>13</sub> H <sub>13</sub> Cl <sub>2</sub> N <sub>17</sub> O <sub>7</sub> | C <sub>14</sub> H <sub>24</sub> N <sub>10</sub> O <sub>7</sub> | C <sub>5</sub> H <sub>2</sub> ClN <sub>9</sub> O <sub>6</sub> |
| Formula Weight                | 590.30                                                                         | 444.43                                                         | 319.61                                                        |
| Temperature (K)               | 140.0                                                                          | 150.0                                                          | 150.0                                                         |
| Crystal System                | monoclinic                                                                     | monoclinic                                                     | orthorhombic                                                  |
| Space group                   | P2 <sub>1</sub> /n                                                             | P2 <sub>1</sub> /n                                             | Pca2 <sub>1</sub>                                             |
| a (Å)                         | 17.345(3)                                                                      | 12.259(6)                                                      | 37.714(5)                                                     |
| b (Å)                         | 5.5381(9)                                                                      | 6.700(3)                                                       | 6.7183(12)                                                    |
| c (Å)                         | 25.004(4)                                                                      | 26.067(11)                                                     | 13.638(2)                                                     |
| α (°)                         | 90                                                                             | 90                                                             | 90                                                            |
| β (°)                         | 105.662(5)                                                                     | 98.140(14)                                                     | 90                                                            |
| γ (°)                         | 90                                                                             | 90                                                             | 90                                                            |
| Volume (Å <sup>3</sup> )      | 2312.6(6)                                                                      | 2119.5(16)                                                     | 3455.5(9)                                                     |
| Z                             | 4                                                                              | 4                                                              | 12                                                            |
| Density (g·cm <sup>-3</sup> ) | 1.695                                                                          | 1.393                                                          | 1.843                                                         |

|                                                     |                                                                  |                                                                  |                                                                  |
|-----------------------------------------------------|------------------------------------------------------------------|------------------------------------------------------------------|------------------------------------------------------------------|
| $\mu$ (mm <sup>-1</sup> )                           | 0.359                                                            | 0.113                                                            | 0.385                                                            |
| F (000)                                             | 1200.0                                                           | 936.0                                                            | 1920.0                                                           |
| Crystal size/mm <sup>3</sup>                        | 0.11 × 0.06 × 0.03                                               | 0.15 × 0.08 × 0.03                                               | 0.18 × 0.16 × 0.14                                               |
| Index ranges                                        | -19 ≤ h ≤ 21,<br>-6 ≤ k ≤ 6,<br>-29 ≤ l ≤ 30                     | -14 ≤ h ≤ 14<br>-7 ≤ k ≤ 8<br>-31 ≤ l ≤ 31                       | -46 ≤ h ≤ 42<br>-6 ≤ k ≤ 8<br>-12 ≤ l ≤ 17                       |
| 2 $\theta$ range for data collection (°)            | 4.878 to 51.54                                                   | 6.182 to 50.496                                                  | 4.32 to 52.764                                                   |
| Reflections collected                               | 11145                                                            | 13290                                                            | 15732                                                            |
| Independent reflections                             | 4383 [R <sub>int</sub> = 0.1202,<br>R <sub>sigma</sub> = 0.1678] | 3721 [R <sub>int</sub> = 0.1123,<br>R <sub>sigma</sub> = 0.1102] | 6057 [R <sub>int</sub> = 0.0991,<br>R <sub>sigma</sub> = 0.1190] |
| Data/restraints/parameters                          | 4383/0/359                                                       | 3721/0/287                                                       | 6057/27/569                                                      |
| Goodness-of-fit on F <sup>2</sup>                   | 1.024                                                            | 1.050                                                            | 1.084                                                            |
| Final R indexes [I >= 2 $\sigma$ (I)]               | R <sub>1</sub> = 0.0768, wR <sub>2</sub> = 0.1319                | R <sub>1</sub> = 0.0936, wR <sub>2</sub> = 0.2394                | R <sub>1</sub> = 0.0784, wR <sub>2</sub> = 0.1788                |
| Final R indexes [all data]                          | R <sub>1</sub> = 0.1786, wR <sub>2</sub> = 0.1758                | R <sub>1</sub> = 0.0936, wR <sub>2</sub> = 0.2800                | R <sub>1</sub> = 0.1497, wR <sub>2</sub> = 0.2217                |
| Largest peak/hole (e <sup>-</sup> Å <sup>-3</sup> ) | 0.45/-0.55                                                       | 0.39/-0.44                                                       | 0.76/-0.56                                                       |

**Table S2.** Crystal data, data collection, and refinement for **6** and **10**

|                   | <b>6</b> ·1.5 H <sub>2</sub> O                                                 | <b>10</b> ·H <sub>2</sub> O                                  |
|-------------------|--------------------------------------------------------------------------------|--------------------------------------------------------------|
| CCDC No.          | 2151873                                                                        | 2151874                                                      |
| Empirical Formula | C <sub>10</sub> H <sub>10</sub> K <sub>2</sub> N <sub>18</sub> O <sub>15</sub> | C <sub>5</sub> H <sub>8</sub> N <sub>10</sub> O <sub>7</sub> |
| Formula Weight    | 700.56                                                                         | 320.21                                                       |
| Temperature (K)   | 170.0                                                                          | 150.0                                                        |
| Crystal System    | monoclinic                                                                     | triclinic                                                    |
| Space group       | C2/c                                                                           | P-1                                                          |
| a (Å)             | 43.231(8)                                                                      | 10.2673(4)                                                   |
| b (Å)             | 9.0006(15)                                                                     | 10.8434(5)                                                   |
| c (Å)             | 12.327(2)                                                                      | 11.9935(5)                                                   |
| $\alpha$ (°)      | 90                                                                             | 80.6090(10)                                                  |
| $\beta$ (°)       | 102.157(5)                                                                     | 70.4600(10)                                                  |
| $\gamma$ (°)      | 90                                                                             | 80.229(2)                                                    |

|                                              |                                                              |                                                              |
|----------------------------------------------|--------------------------------------------------------------|--------------------------------------------------------------|
| Volume (Å <sup>3</sup> )                     | 4689.0(14)                                                   | 1231.95(9)                                                   |
| Z                                            | 8                                                            | 4                                                            |
| Density (g·cm <sup>-3</sup> )                | 1.985                                                        | 1.726                                                        |
| μ (mm <sup>-1</sup> )                        | 0.522                                                        | 0.158                                                        |
| F (000)                                      | 2832.0                                                       | 656.0                                                        |
| Crystal size/mm <sup>3</sup>                 | 0.08 × 0.05 × 0.04                                           | 0.15 × 0.08 × 0.05                                           |
|                                              | -50 ≤ h ≤ 51                                                 | -12 ≤ h ≤ 12                                                 |
| Index ranges                                 | -10 ≤ k ≤ 10                                                 | -13 ≤ k ≤ 13                                                 |
|                                              | -14 ≤ l ≤ 14                                                 | -14 ≤ l ≤ 15                                                 |
| 2θ range for data collection (°)             | 4.628 to 50.752                                              | 3.836 to 52.892                                              |
| Reflections collected                        | 18926                                                        | 14147                                                        |
| Independent reflections                      | 4254[R <sub>int</sub> = 0.1119, R <sub>sigma</sub> = 0.1119] | 5000[R <sub>int</sub> = 0.0566, R <sub>sigma</sub> = 0.0636] |
| Data/restraints/parameters                   | 4254/2/412                                                   | 5000/4/461                                                   |
| Goodness-of-fit on F <sup>2</sup>            | 1.033                                                        | 1.073                                                        |
| Final R indexes [I ≥ 2σ(I)]                  | R <sub>1</sub> = 0.0593, wR <sub>2</sub> = 0.1144            | R <sub>1</sub> = 0.0433, wR <sub>2</sub> = 0.0933            |
| Final R indexes [all data]                   | R <sub>1</sub> = 0.1279, wR <sub>2</sub> = 0.1456            | R <sub>1</sub> = 0.0735, wR <sub>2</sub> = 0.1077            |
| Largest diff. peak/hole (e·Å <sup>-3</sup> ) | 0.41/-0.39                                                   | 0.31/-0.35                                                   |

**Table S2.** Crystal data, data collection, and refinement for **7** and **13**

|                               | <b>7</b> ·0.5 H <sub>2</sub> O                                   | <b>13</b> ·0.5 H <sub>2</sub> O                                                 |
|-------------------------------|------------------------------------------------------------------|---------------------------------------------------------------------------------|
| CCDC No.                      | 2151868                                                          | 2151869                                                                         |
| Empirical Formula             | C <sub>2</sub> H <sub>2</sub> ClKN <sub>9</sub> O <sub>7.5</sub> | C <sub>10</sub> H <sub>18</sub> C <sub>12</sub> N <sub>22</sub> O <sub>15</sub> |
| Formula Weight                | 382.71                                                           | 757.36                                                                          |
| Temperature (K)               | 170                                                              | 170                                                                             |
| Crystal System                | monoclinic                                                       | monoclinic                                                                      |
| Space group                   | C2/c                                                             | C2/c                                                                            |
| a (Å)                         | 21.576(4)                                                        | 33.372(4)                                                                       |
| b (Å)                         | 7.2159(11)                                                       | 6.9585(7)                                                                       |
| c (Å)                         | 15.648(2)                                                        | 25.558(3)                                                                       |
| α (°)                         | 90                                                               | 90                                                                              |
| β (°)                         | 94.847(5)                                                        | 111.533(4)                                                                      |
| γ (°)                         | 90                                                               | 90                                                                              |
| Volume (Å <sup>3</sup> )      | 2427.5(7)                                                        | 5520.8(11)                                                                      |
| Z                             | 8                                                                | 8                                                                               |
| Density (g·cm <sup>-3</sup> ) | 2.094                                                            | 1.822                                                                           |

|                                              |                                                               |                                                               |
|----------------------------------------------|---------------------------------------------------------------|---------------------------------------------------------------|
| $\mu$ (mm <sup>-1</sup> )                    | 0.727                                                         | 0.348                                                         |
| F (000)                                      | 1528.0                                                        | 3088.0                                                        |
| Crystal size/mm <sup>3</sup>                 | 0.12 × 0.08 × 0.04                                            | 0.15 × 0.08 × 0.04                                            |
|                                              | 26 ≤ h ≤ 26                                                   | -41 ≤ h ≤ 39                                                  |
| Index ranges                                 | -9 ≤ k ≤ 9                                                    | -8 ≤ k ≤ 8                                                    |
|                                              | -19 ≤ l ≤ 15                                                  | -32 ≤ l ≤ 30                                                  |
| 2 $\theta$ range for data collection (°)     | 3.788 to 52.9                                                 | 5.024 to 52.872                                               |
| Reflections collected                        | 8788                                                          | 22759                                                         |
| Independent reflections                      | 2486 [R <sub>int</sub> = 0.0718, R <sub>sigma</sub> = 0.0673] | 5612 [R <sub>int</sub> = 0.0949, R <sub>sigma</sub> = 0.0869] |
| Data/restraints/parameters                   | 2486/2/221                                                    | 5612/28/442                                                   |
| Goodness-of-fit on F <sup>2</sup>            | 1.043                                                         | 1.012                                                         |
| Final R indexes [I ≥ 2 $\sigma$ (I)]         | R <sub>1</sub> = 0.0482, wR <sub>2</sub> = 0.0971             | R <sub>1</sub> = 0.0538, wR <sub>2</sub> = 0.0922             |
| Final R indexes [all data]                   | R <sub>1</sub> = 0.0843, wR <sub>2</sub> = 0.1129             | R <sub>1</sub> = 0.1171, wR <sub>2</sub> = 0.1157             |
| Largest diff. peak/hole (e·Å <sup>-3</sup> ) | 0.35/-0.44                                                    | 0.33/-0.41                                                    |

**Table S3** Bond Length in Å for **6**·1.5 H<sub>2</sub>O

| Atom1 | Atom2 | Length/ Å |
|-------|-------|-----------|
| C1    | C2    | 1.423(7)  |
| C1    | N1    | 1.353(6)  |
| C1    | N2    | 1.440(7)  |
| C2    | N3    | 1.370(6)  |
| C2    | N5    | 1.359(7)  |
| C3    | N3    | 1.312(7)  |
| C3    | N4    | 1.371(6)  |
| C3    | N8    | 1.352(6)  |
| C4    | C5    | 1.417(6)  |
| C4    | N4    | 1.354(7)  |
| C4    | N6    | 1.306(6)  |
| C5    | N7    | 1.327(6)  |
| C5    | N9    | 1.448(7)  |
| C6    | C7    | 1.428(6)  |
| C6    | N11   | 1.432(7)  |
| C6    | N13   | 1.334(6)  |
| C7    | N10   | 1.295(6)  |
| C7    | N14   | 1.366(6)  |
| C8    | N12   | 1.357(6)  |
| C8    | N14   | 1.370(6)  |
| C8    | N16   | 1.308(6)  |
| C9    | C10   | 1.448(7)  |

|     |      |          |
|-----|------|----------|
| C9  | N15  | 1.346(6) |
| C9  | N16  | 1.367(6) |
| C10 | N17  | 1.361(6) |
| C10 | N18  | 1.427(7) |
| K1  | O2   | 2.760(4) |
| K1  | O3   | 2.739(5) |
| K1  | O11  | 3.223(3) |
| K1  | O12  | 2.733(3) |
| K2  | O3   | 2.709(4) |
| K2  | O12  | 2.748(4) |
| K2  | O13  | 2.845(4) |
| N1  | O1   | 1.272(6) |
| N1  | O2   | 1.254(6) |
| N2  | O4   | 1.242(7) |
| N2  | O5   | 1.227(6) |
| N4  | N5   | 1.367(5) |
| N6  | H6A  | 0.88     |
| N6  | H6B  | 0.879    |
| N7  | N8   | 1.316(6) |
| N9  | O7   | 1.225(6) |
| N9  | O8   | 1.224(6) |
| N10 | H10A | 0.88     |
| N10 | H10B | 0.878    |
| N11 | O9   | 1.223(5) |
| N11 | O10  | 1.223(5) |
| N12 | N13  | 1.308(6) |
| N14 | N15  | 1.362(5) |
| N17 | O11  | 1.254(5) |
| N17 | O12  | 1.261(5) |
| N18 | O13  | 1.248(5) |
| N18 | O14  | 1.238(5) |
| O3  | H3A  | 0.87(4)  |
| O3  | H3B  | 0.86(4)  |
| O15 | H15A | 0.871    |
| O15 | H15B | 0.689    |
| O6  | H6C  | 0.871    |
| O6  | H6D  | 0.756    |
| N10 | H10B | 0.878    |
| N11 | O9   | 1.223(5) |

**Table S4** Bond Length in Å for 7·0.5 H<sub>2</sub>O

| Atom1 | Atom2 | Length/ Å |
|-------|-------|-----------|
| C1    | C2    | 1.374(5)  |
| C1    | Cl1   | 1.667(4)  |

|    |    |          |
|----|----|----------|
| C1 | N1 | 1.350(4) |
| C2 | N3 | 1.318(4) |
| C2 | N4 | 1.448(5) |
| C3 | N2 | 1.416(4) |
| C3 | N5 | 1.346(4) |
| C3 | N6 | 1.307(4) |
| C4 | C5 | 1.444(5) |
| C4 | N5 | 1.342(4) |
| C4 | N7 | 1.349(4) |
| C5 | N8 | 1.377(4) |
| C5 | N9 | 1.420(5) |
| K1 | N3 | 2.932(3) |
| K1 | N5 | 2.914(3) |
| K1 | O4 | 2.856    |
| K1 | O5 | 2.745(3) |
| N1 | N2 | 1.375(4) |
| N1 | O3 | 1.252(4) |
| N2 | N3 | 1.330(4) |
| N4 | O1 | 1.208(4) |
| N4 | O2 | 1.216(4) |
| N6 | N7 | 1.363(4) |
| N7 | H7 | 0.88     |
| N8 | O7 | 1.236(4) |
| N8 | O8 | 1.274(4) |
| N9 | O5 | 1.236(4) |
| N9 | O6 | 1.229(4) |
| O4 | H4 | 0.822    |

**Table S5** Hydrogen Bond information for **10·H<sub>2</sub>O**

| D   | H    | A   | d(D-H)/ Å | d(H-A)/ Å | d(D-A)/ Å | D-H-A/ deg |
|-----|------|-----|-----------|-----------|-----------|------------|
| O1  | H1A  | O12 | 0.83      | 2.14      | 2.954(2)  | 166        |
| O1  | H1B  | O3  | 0.89      | 2.15      | 2.995(2)  | 157        |
| O2  | H2A  | N16 | 0.84      | 2.02      | 2.867(3)  | 178        |
| O2  | H2B  | N3  | 0.88      | 2.00      | 2.874(2)  | 169        |
| N8  | H8A  | N4  | 0.88      | 2.48      | 2.804(2)  | 102        |
| N8  | H8A  | O3  | 0.88      | 2.12      | 2.909(2)  | 148        |
| N8  | H8A  | O5  | 0.88      | 2.28      | 3.002(2)  | 139        |
| N8  | H8B  | O8  | 0.88      | 2.12      | 2.695(2)  | 122        |
| N8  | H8B  | O11 | 0.88      | 2.17      | 2.963(2)  | 149        |
| N13 | H13A | N15 | 0.88      | 2.46      | 2.792(3)  | 103        |
| N13 | H13A | O10 | 0.88      | 2.21      | 2.944(2)  | 140        |
| N13 | H13A | O12 | 0.88      | 2.19      | 2.940(2)  | 144        |
| N13 | H13B | O6  | 0.88      | 2.13      | 2.948(2)  | 154        |
| N13 | H13B | O14 | 0.88      | 2.15      | 2.707(2)  | 121        |



|     |      |     |      |      |          |     |
|-----|------|-----|------|------|----------|-----|
| N19 | H19A | O1  | 1.00 | 1.92 | 2.905(3) | 167 |
| N19 | H19B | O2  | 0.91 | 1.85 | 2.746(3) | 167 |
| N19 | H19C | O9  | 0.96 | 2.54 | 3.128(3) | 120 |
| N19 | H19C | O10 | 0.96 | 2.16 | 3.116(3) | 173 |
| N19 | H19D | O3  | 0.89 | 2.26 | 3.041(3) | 146 |
| N20 | H20A | O4  | 0.89 | 2.41 | 2.756(3) | 103 |
| N20 | H20A | N6  | 0.89 | 2.50 | 3.214(3) | 138 |
| N20 | H20A | N7  | 0.89 | 2.00 | 2.875(3) | 168 |
| N20 | H20B | O1  | 0.90 | 1.95 | 2.835(2) | 168 |
| N20 | H20C | N12 | 0.88 | 2.44 | 2.974(3) | 120 |
| N20 | H20C | O6  | 0.88 | 2.32 | 3.045(2) | 141 |
| N20 | H20D | O13 | 0.86 | 2.38 | 2.917(3) | 121 |
| N20 | H20D | O9  | 0.86 | 2.22 | 2.797(2) | 125 |

**Table S6** Hydrogen Bond information for **13**·0.5 H<sub>2</sub>O

| D   | H    | A   | d(D-H)/ Å | d(H-A)/ Å | d(D-A)/ Å | D-H-A/ deg |
|-----|------|-----|-----------|-----------|-----------|------------|
| O15 | H15A | O4  | 0.87      | 2.45      | 3.063(4)  | 128        |
| O15 | H15B | O10 | 0.87      | 2.39      | 3.054(4)  | 133        |
| O15 | H15B | O11 | 0.87      | 2.24      | 3.097(4)  | 171        |
| N19 | H19A | O15 | 0.93      | 1.9       | 2.826(5)  | 177        |
| N19 | H19B | O3  | 0.93      | 2.29      | 3.113(5)  | 147        |
| N19 | H19C | O4  | 0.93      | 2.28      | 2.965(5)  | 131        |
| N19 | H19D | O5  | 0.93      | 2.25      | 2.929(4)  | 129        |
| N19 | H19D | N3  | 0.93      | 2.28      | 3.095(4)  | 146        |
| N20 | H20A | O9  | 0.91      | 2.53      | 2.924(4)  | 106        |
| N20 | H20A | N5  | 0.91      | 1.96      | 2.838(4)  | 161        |
| N20 | H20B | O2  | 0.92      | 2.1       | 2.938(4)  | 151        |
| N20 | H20B | O9  | 0.92      | 2.52      | 3.022(4)  | 115        |
| N20 | H20C | O10 | 0.92      | 2.56      | 3.065(4)  | 115        |
| N20 | H20C | O2  | 0.92      | 2.06      | 2.904(4)  | 152        |
| N20 | H20D | O5  | 0.92      | 2.35      | 3.122(4)  | 142        |
| N20 | H20D | N3  | 0.92      | 2.57      | 3.240(4)  | 130        |
| N21 | H21A | N13 | 0.93      | 1.9       | 2.829(4)  | 173        |
| N21 | H21B | N14 | 0.92      | 2.06      | 2.924(4)  | 154        |
| N21 | H21C | O11 | 0.92      | 2.55      | 3.253(4)  | 134        |
| N21 | H21C | O1  | 0.92      | 2.43      | 2.805(4)  | 105        |
| N21 | H21D | O12 | 0.93      | 2.42      | 2.917(4)  | 114        |
| N21 | H21D | N12 | 0.93      | 2.37      | 3.208(4)  | 151        |
| N22 | H22A | N12 | 0.92      | 2.06      | 2.948(4)  | 162        |
| N22 | H22B | O8  | 0.93      | 2.08      | 2.959(4)  | 158        |
| N22 | H22C | N4  | 0.93      | 1.99      | 2.869(4)  | 159        |
| N22 | H22D | O1  | 0.93      | 2.2       | 2.946(4)  | 137        |
| N22 | H22D | O2  | 0.93      | 2.11      | 2.960(4)  | 152        |

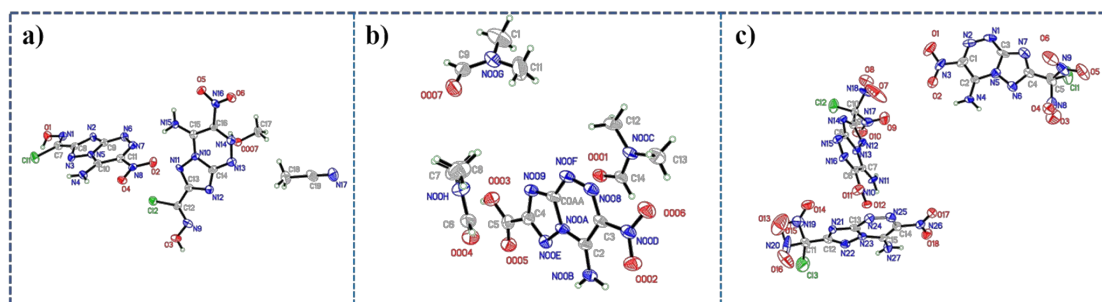

Fig. S1. Crystal structures of a)  $2 \cdot \text{CH}_3\text{CN} \cdot \text{CH}_3\text{OH}$ , b)  $3 \cdot 3 \text{ DMF}$  and c) **4** at the 50% probability level.

#### 4. Spectrums for all new compounds

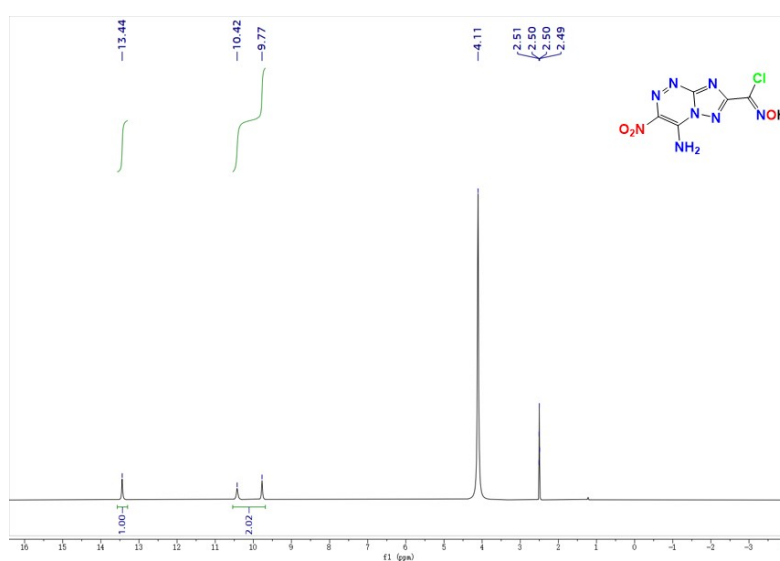

$^1\text{H}$  NMR spectrum of **2** in  $d_6$ -DMSO.

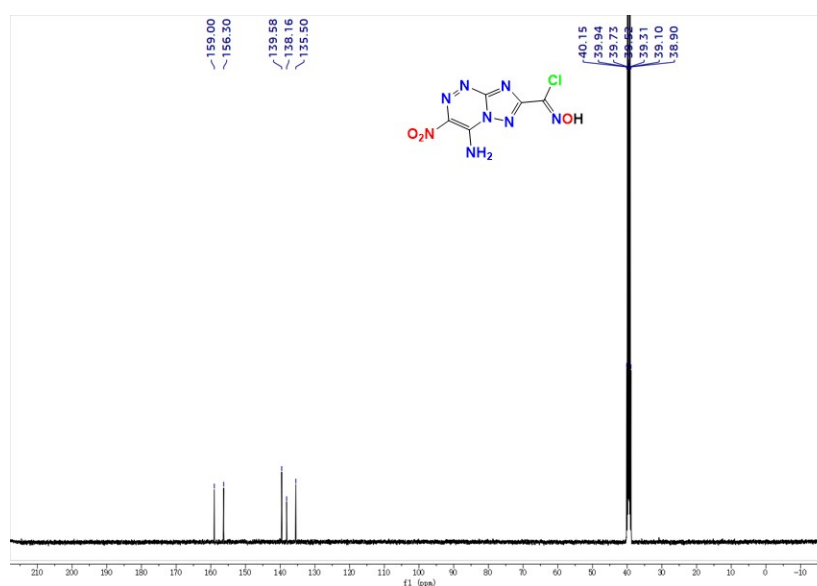

$^{13}\text{C}$  NMR spectrum of **2** in  $d_6$ -DMSO.

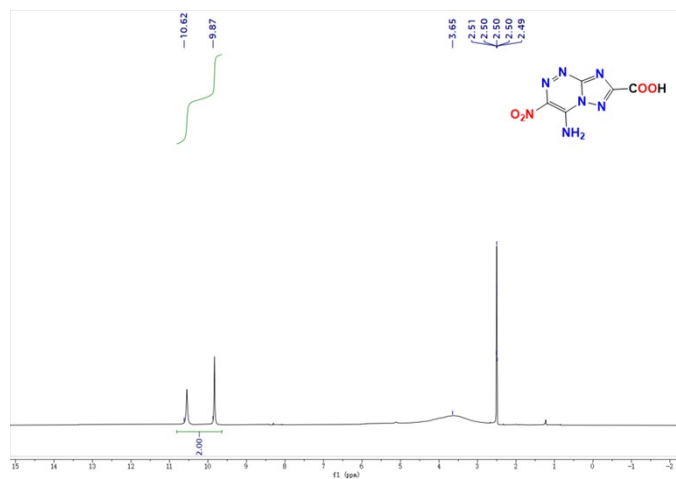

$^1\text{H}$  NMR spectrum of **3** in  $d_6$ -DMSO.

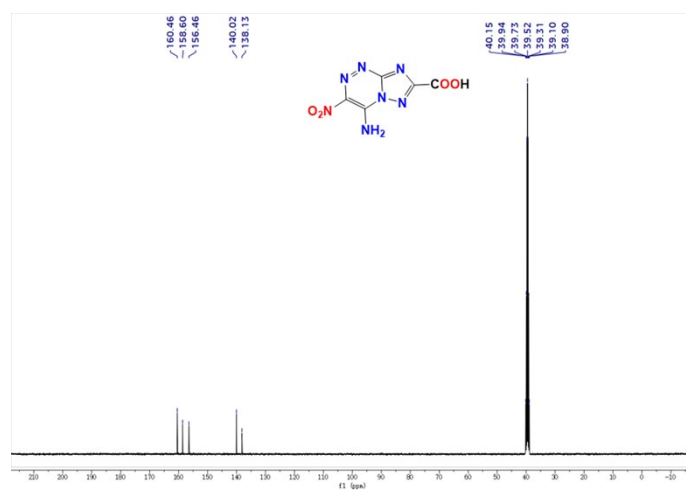

$^{13}\text{C}$  NMR spectrum of **3** in  $d_6$ -DMSO.

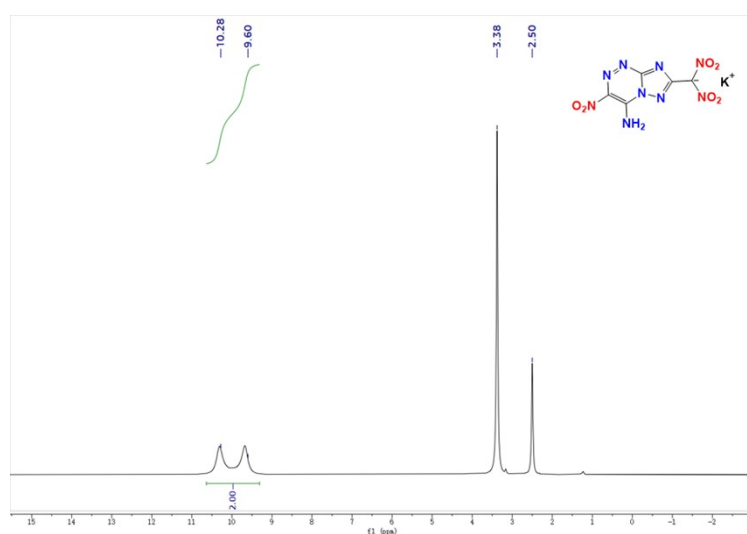

$^1\text{H}$  NMR spectrum of **6** in  $d_6$ -DMSO.

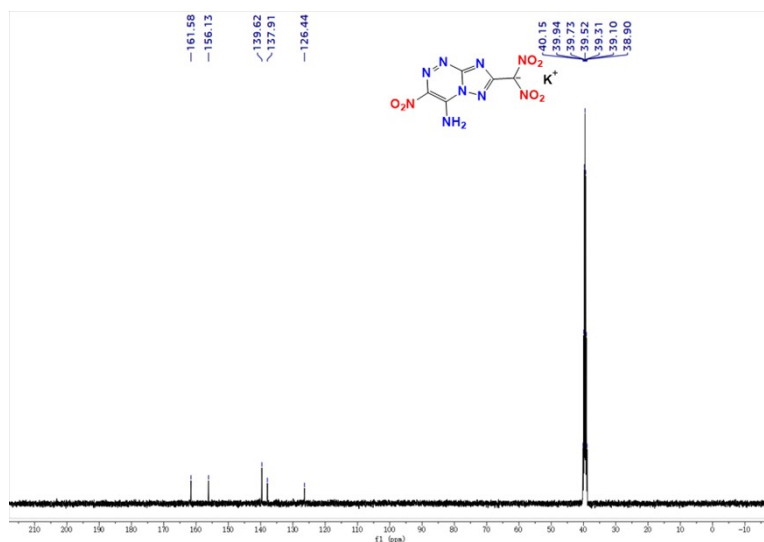

<sup>13</sup>C NMR spectrum of **6** in *d*<sub>6</sub>-DMSO.

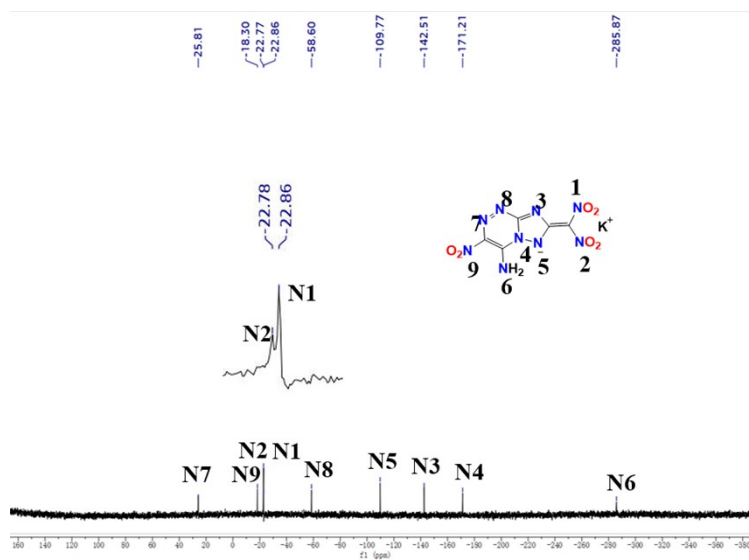

<sup>15</sup>N NMR spectrum of **6** in *d*<sub>6</sub>-DMSO.

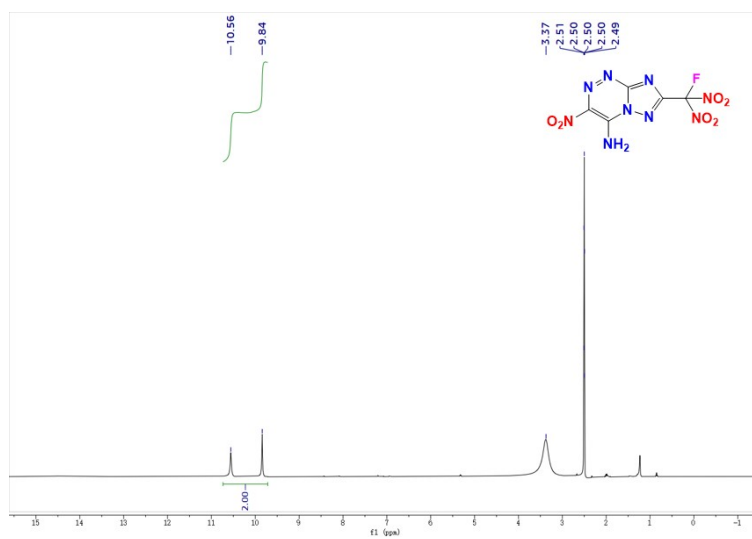

<sup>1</sup>H NMR spectrum of **8** in *d*<sub>6</sub>-DMSO.

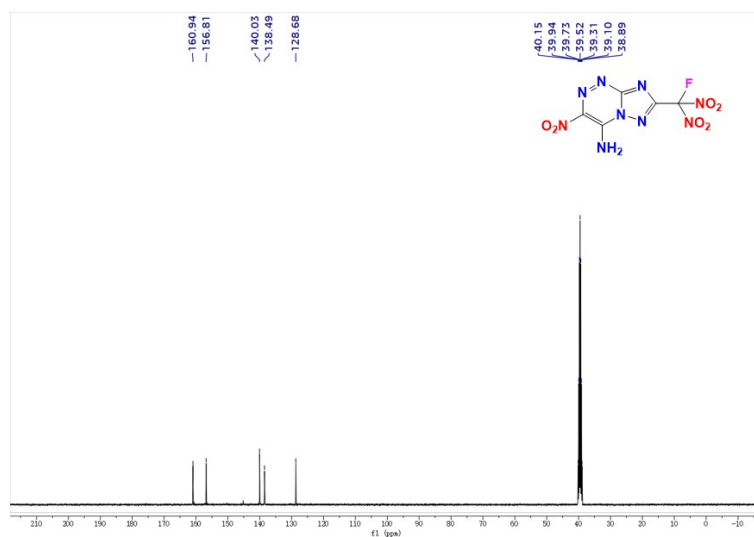

$^{13}\text{C}$  NMR spectrum of **8** in  $d_6$ -DMSO.

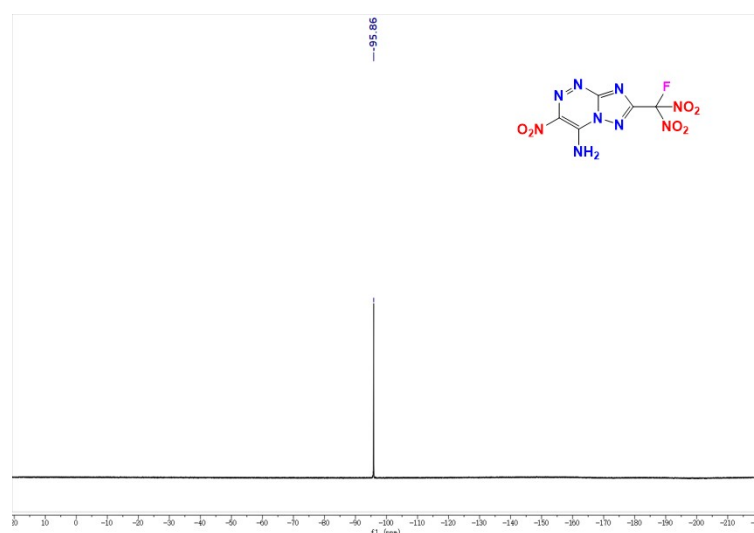

$^{19}\text{F}$  NMR spectrum of **8** in  $d_6$ -DMSO.

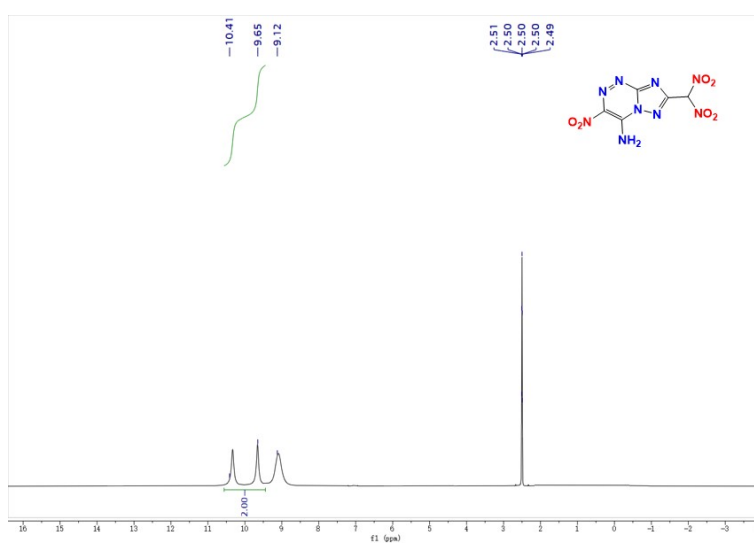

$^1\text{H}$  NMR spectrum of **9** in  $d_6$ -DMSO.

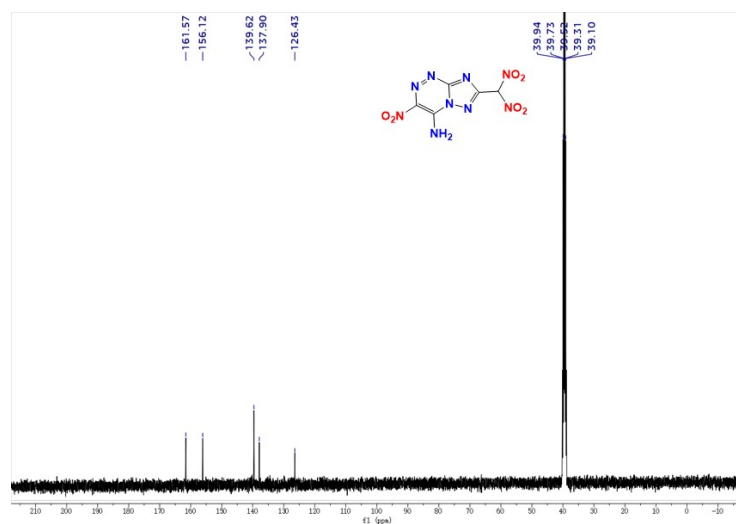

$^{13}\text{C}$  NMR spectrum of **9** in  $d_6$ -DMSO.

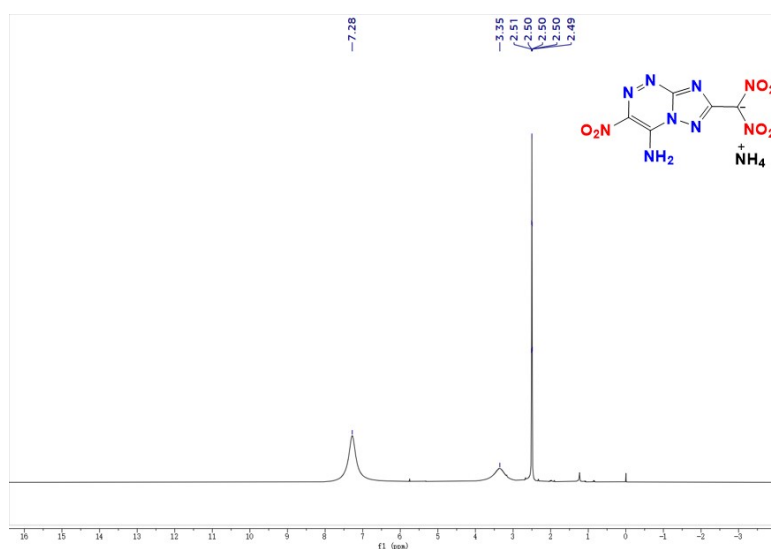

$^1\text{H}$  NMR spectrum of **10** in  $d_6$ -DMSO.

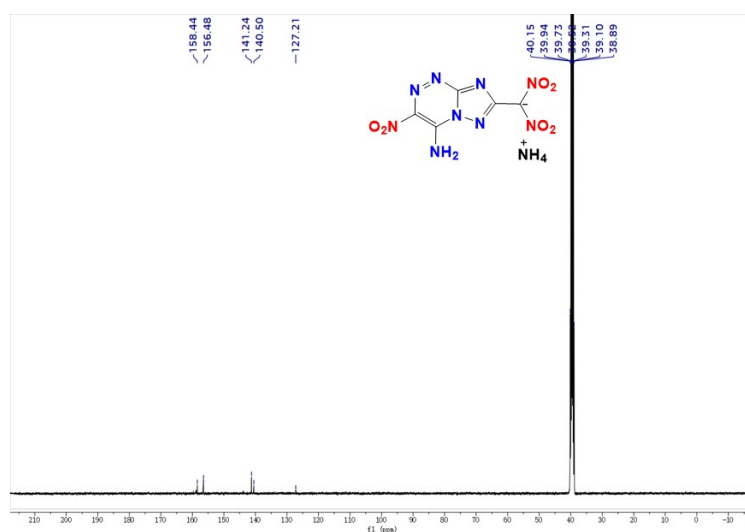

$^{13}\text{C}$  NMR spectrum of **10** in  $d_6$ -DMSO.

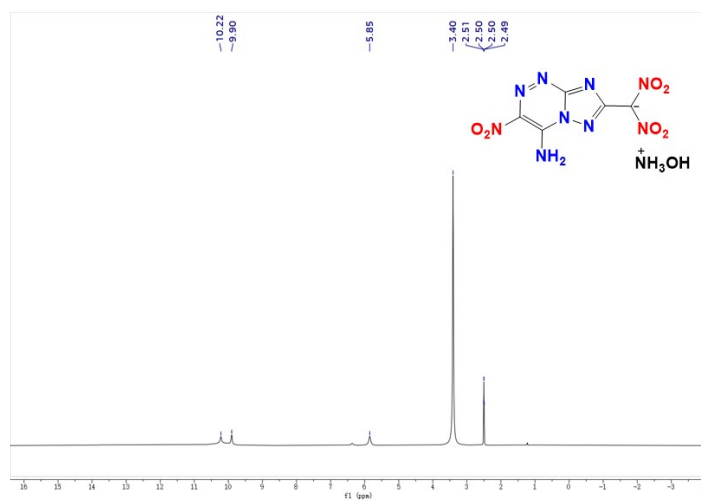

$^1\text{H}$  NMR spectrum of **11** in  $d_6$ -DMSO.

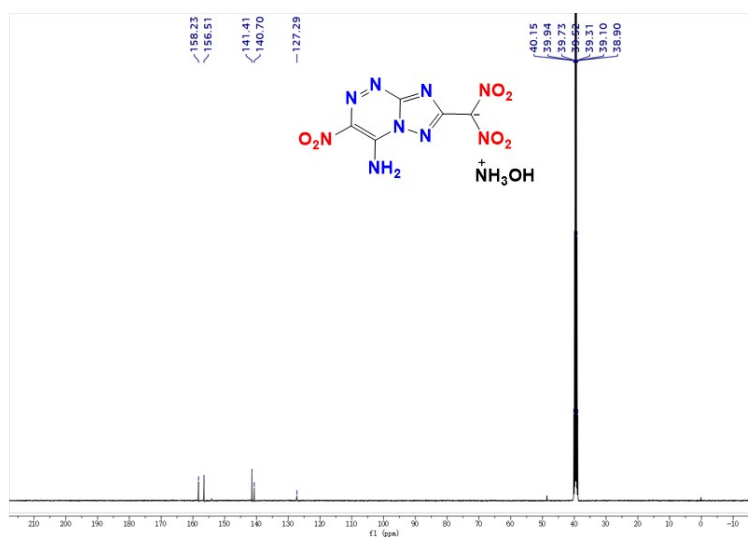

$^{13}\text{C}$  NMR spectrum of **11** in  $d_6$ -DMSO.

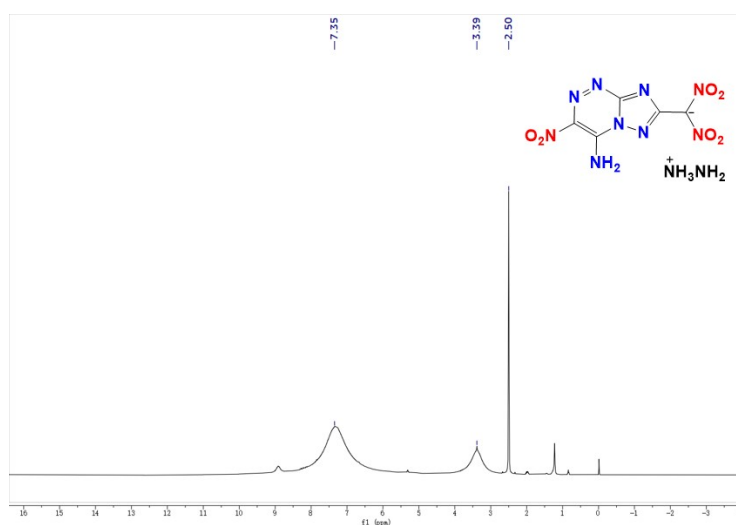

$^1\text{H}$  NMR spectrum of **12** in  $d_6$ -DMSO.

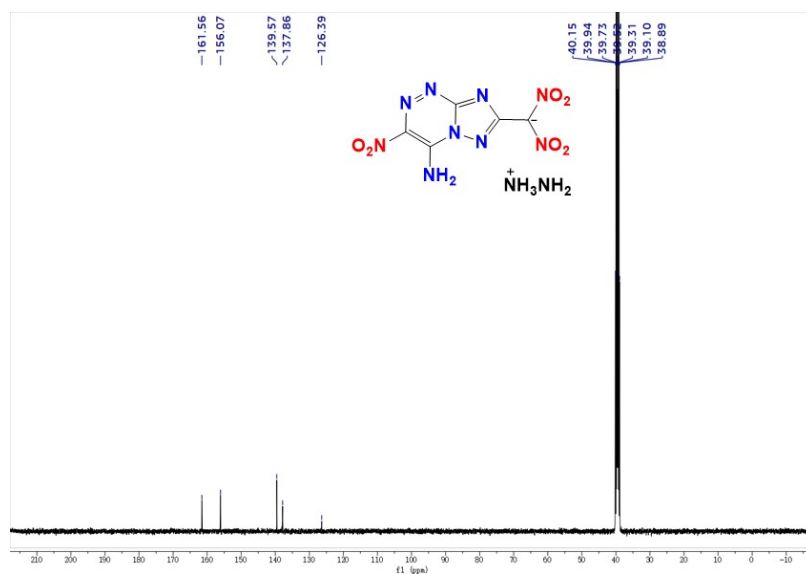

<sup>13</sup>C NMR spectrum of **12** in *d*<sub>6</sub>-DMSO.

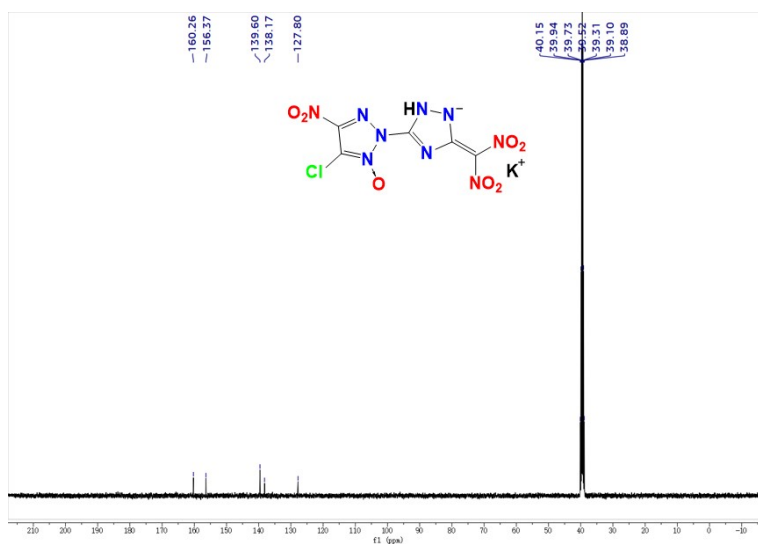

<sup>13</sup>C NMR spectrum of **7** in *d*<sub>6</sub>-DMSO.

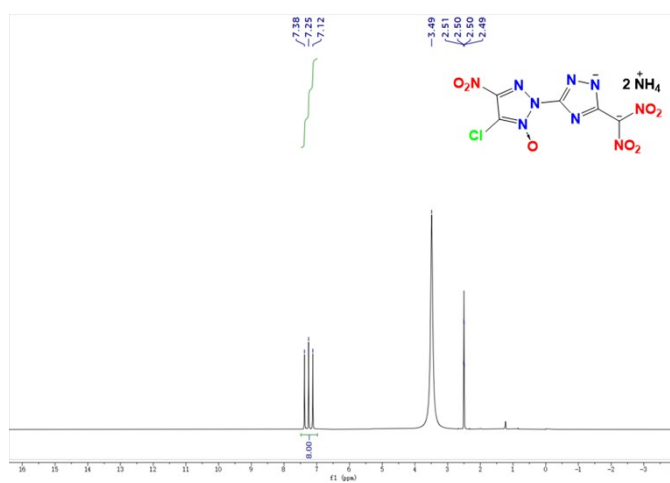

<sup>1</sup>H NMR spectrum of **13** in *d*<sub>6</sub>-DMSO.



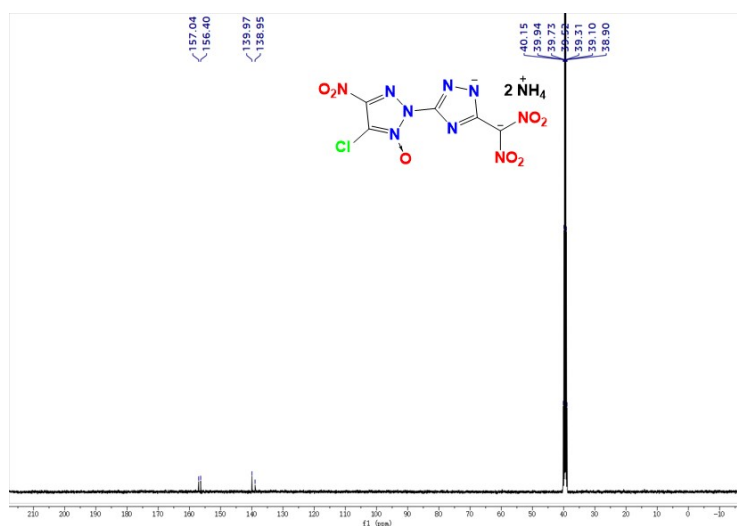

$^{13}\text{C}$  NMR spectrum of **13** in  $d_6$ -DMSO.

## 5. HRMS spectrum for 6-13

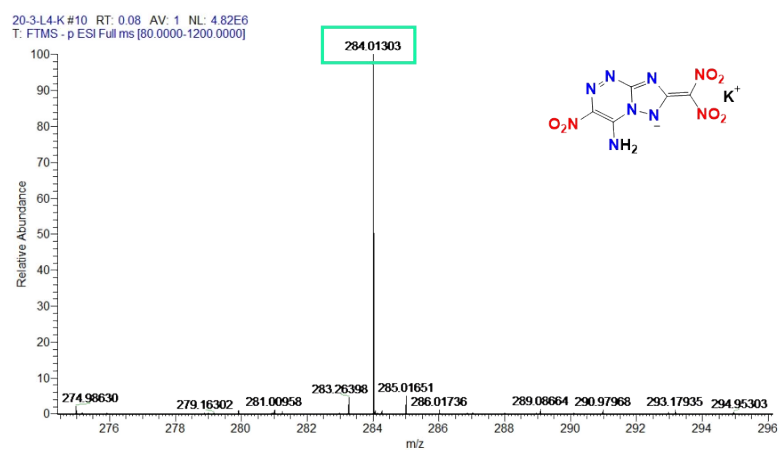

HRMS spectrum for **6**

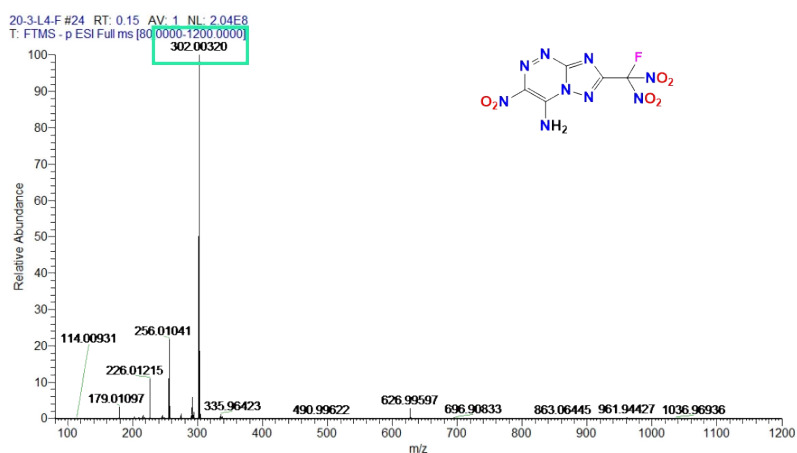

HRMS spectrum for **8**

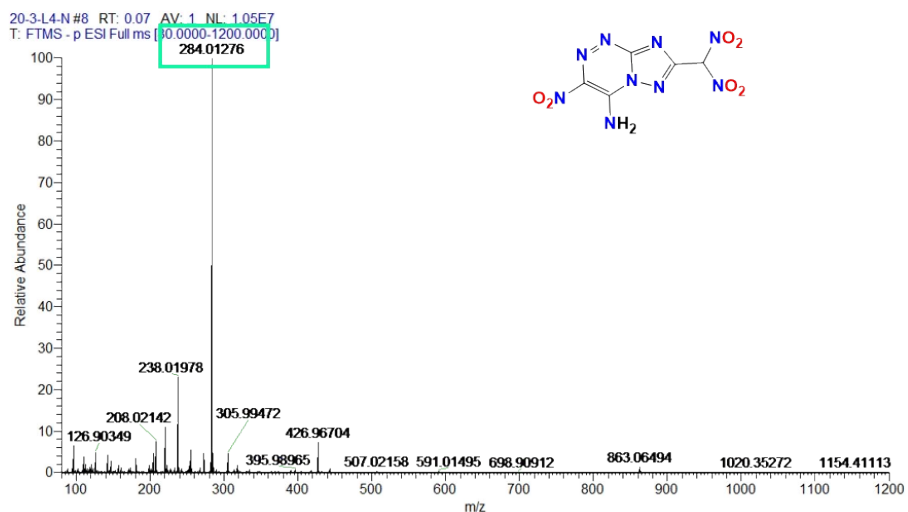

HRMS spectrum for 9

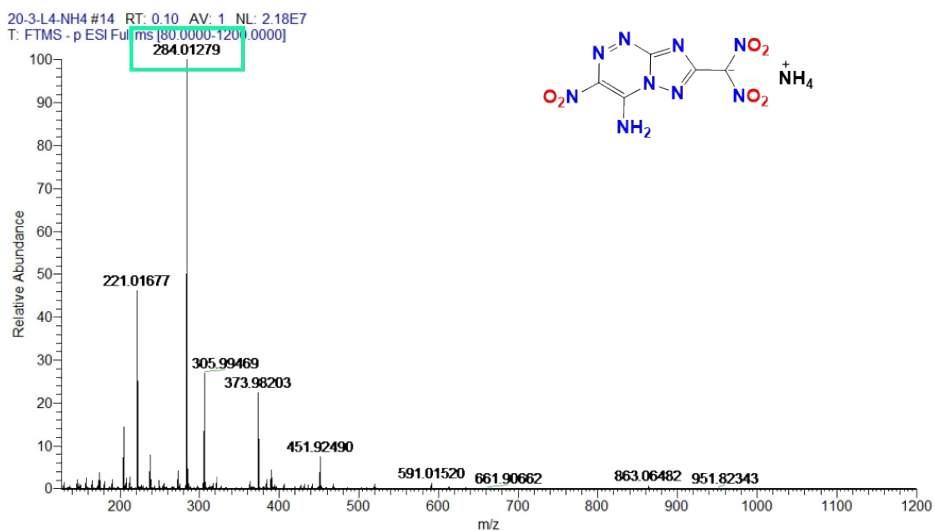

HRMS spectrum for 10

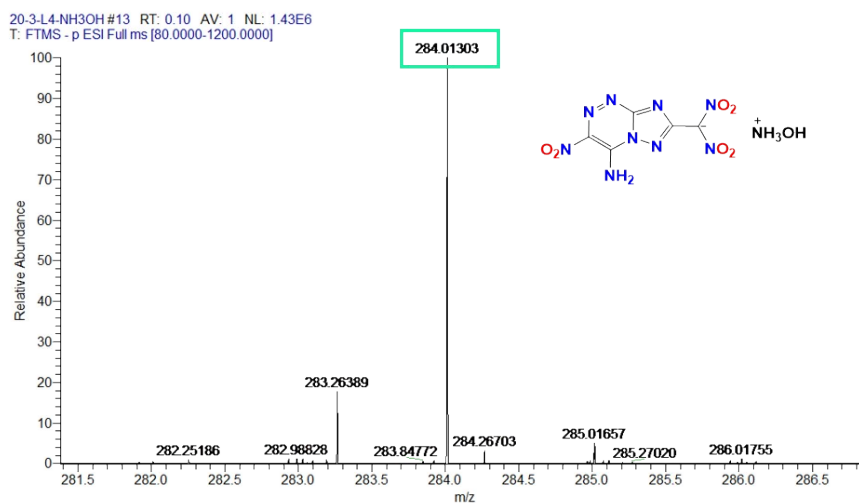

HRMS spectrum for 11

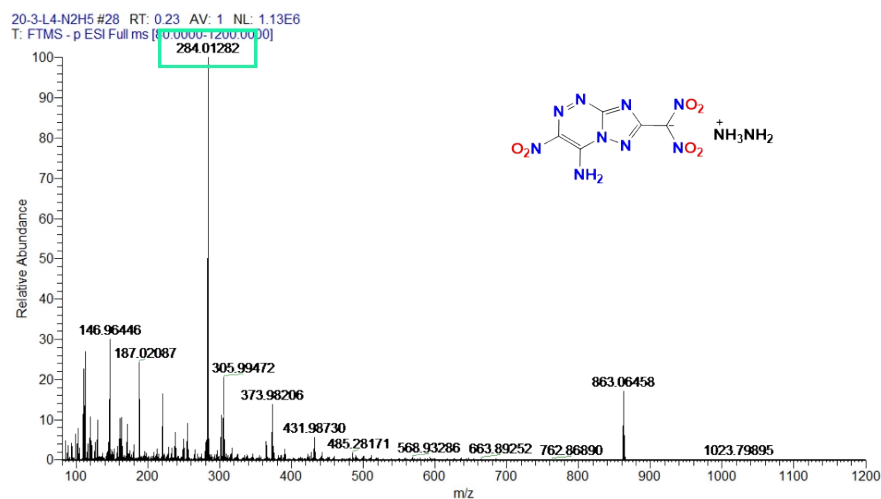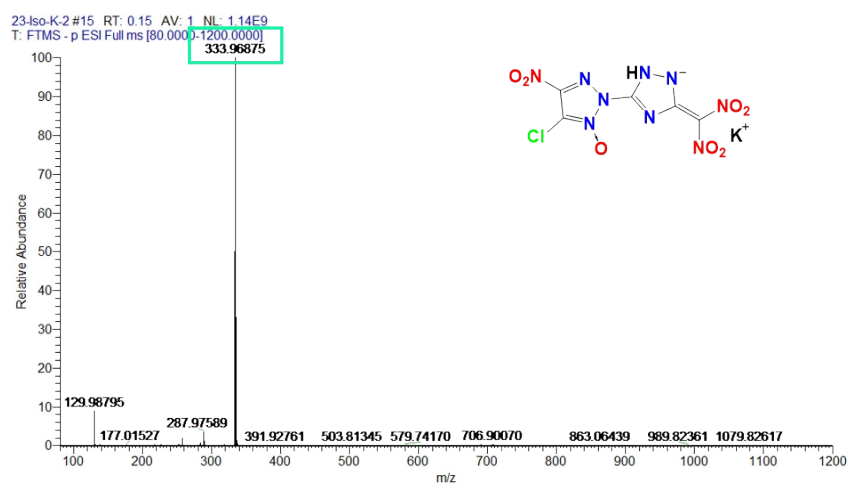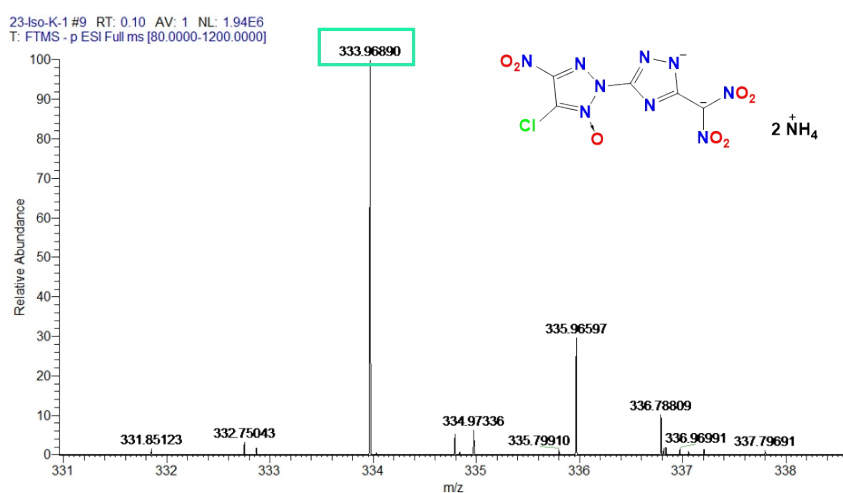

## 6. IR spectra of all new compounds

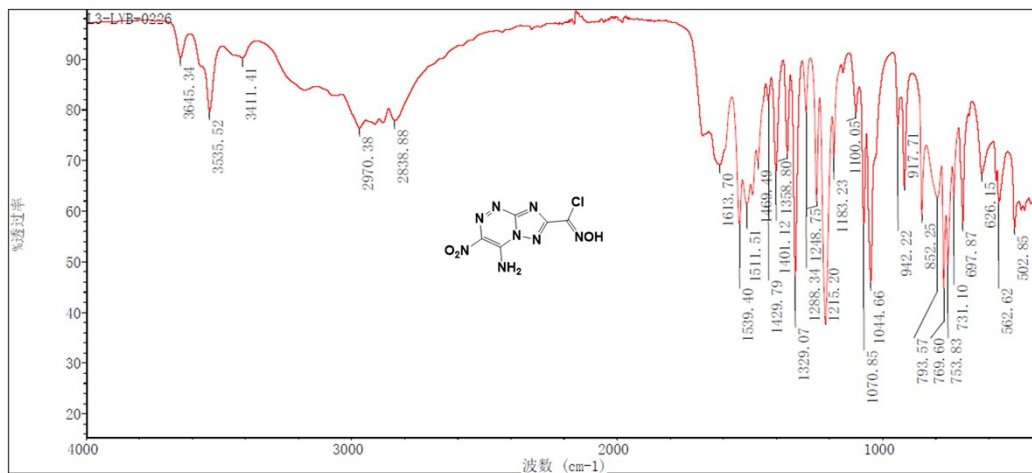

IR spectrum of compound 2

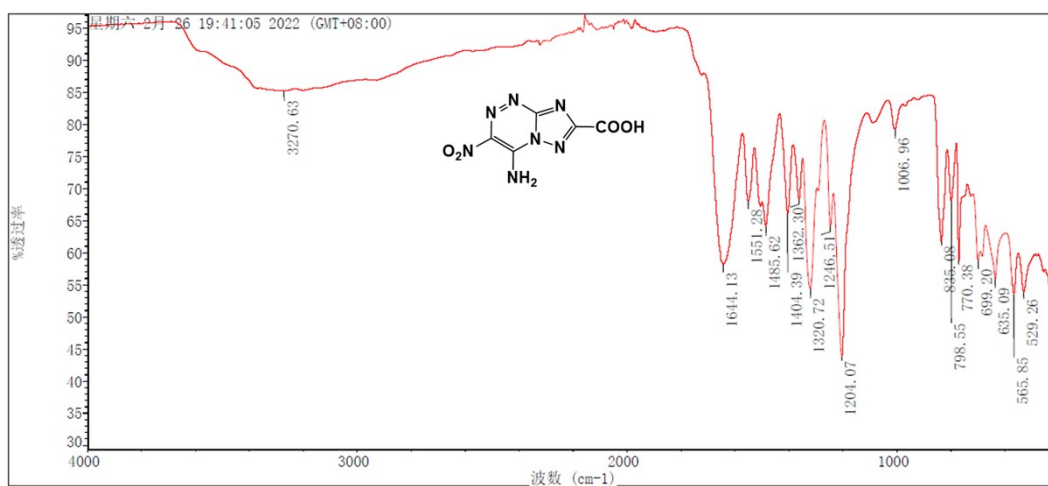

IR spectrum of compound 3

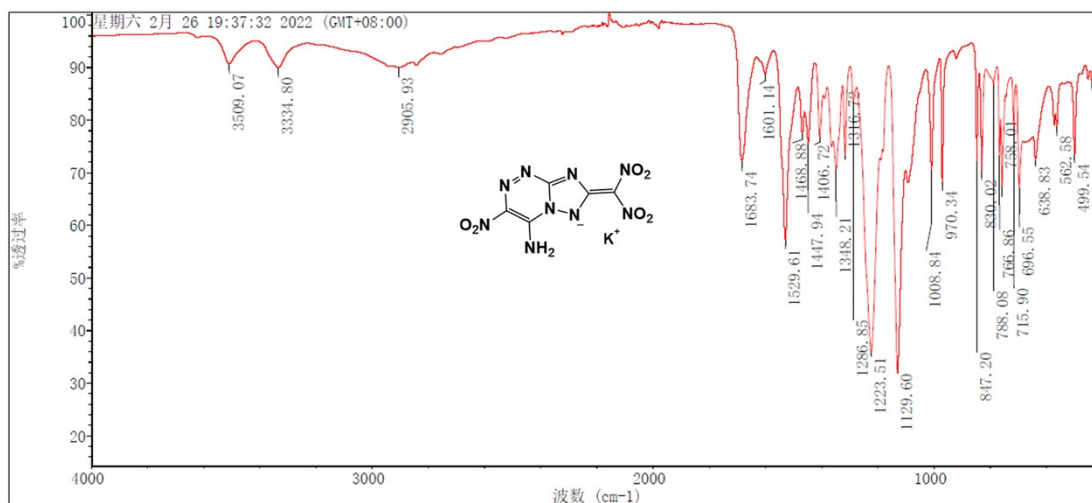

IR spectrum of compound 6

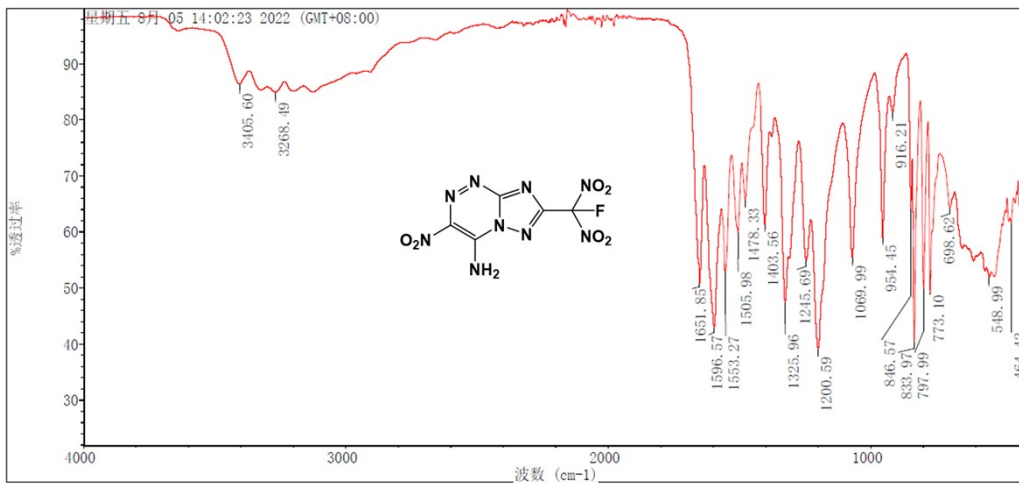

IR spectrum of compound 8

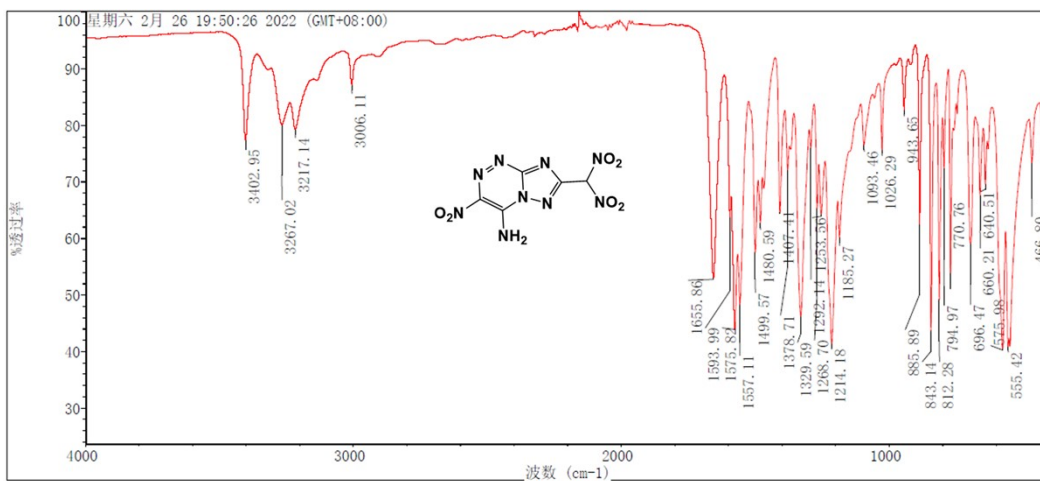

IR spectrum of compound 9

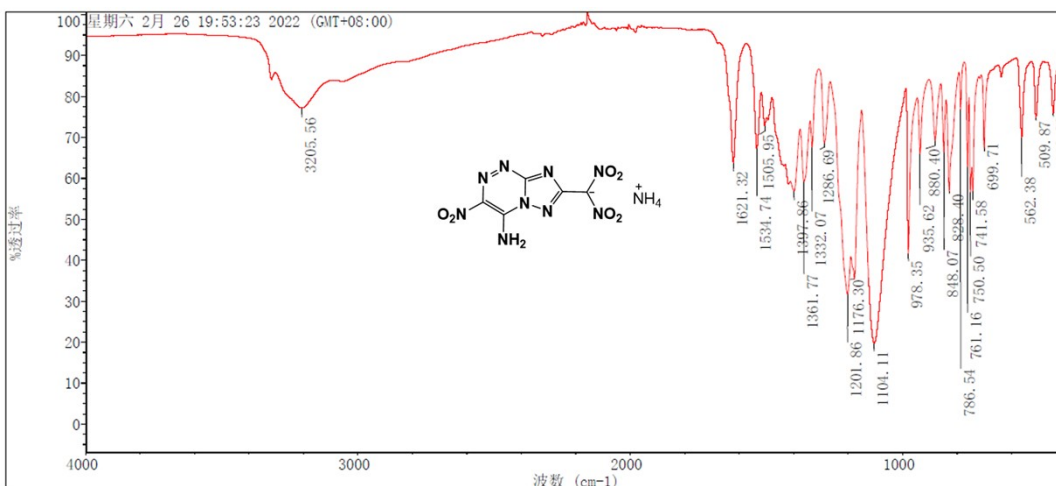

IR spectrum of compound 10

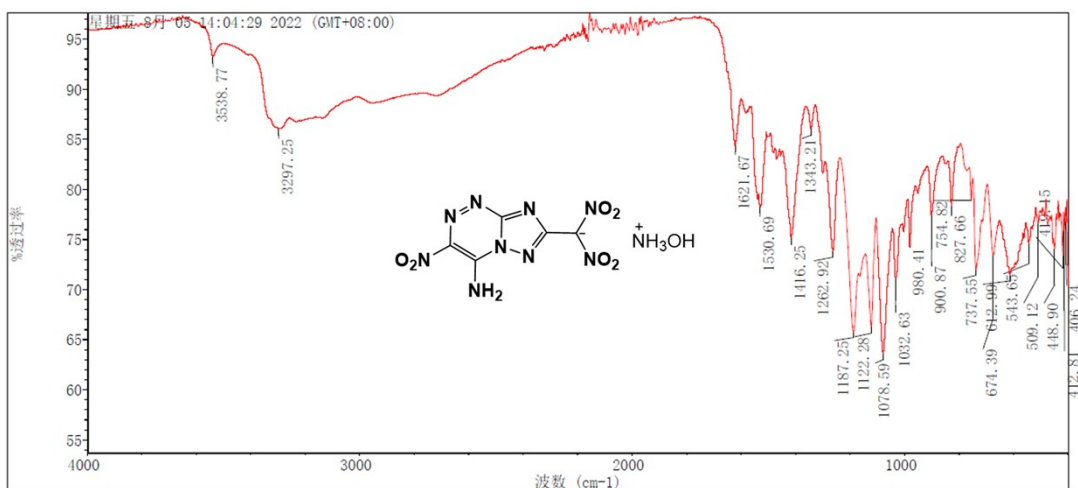

IR spectrum of compound **11**

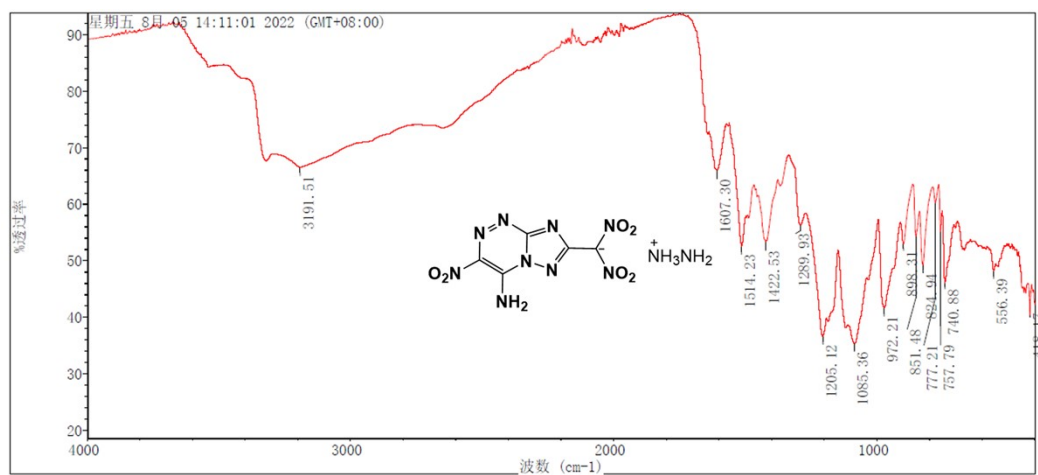

IR spectrum of compound **12**

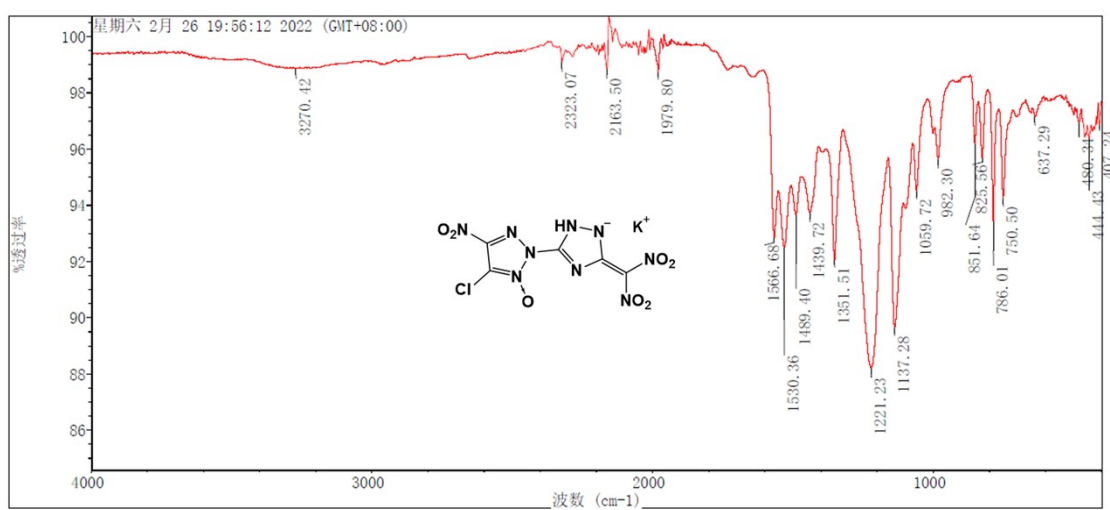

IR spectrum of compound **7**

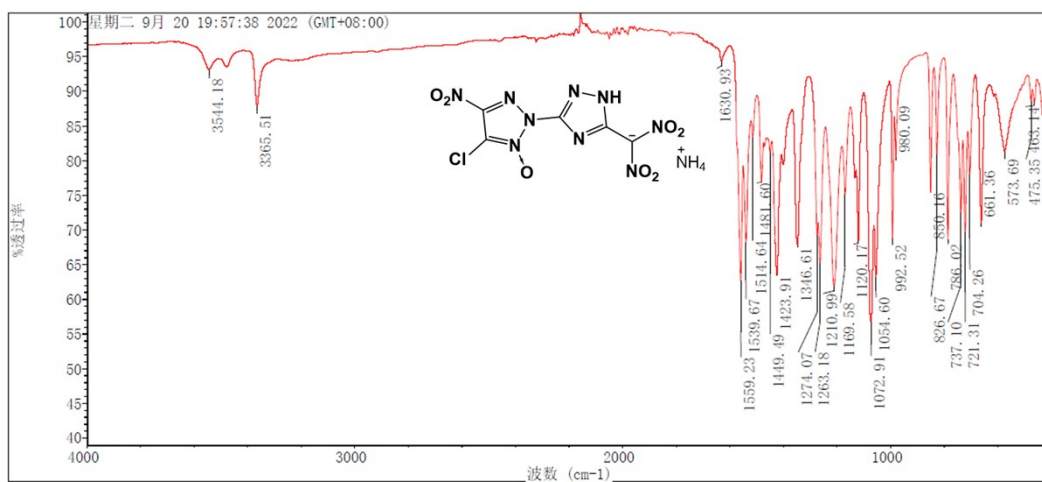

IR spectrum of compound **13**

## 7. DSC plots for 6-13

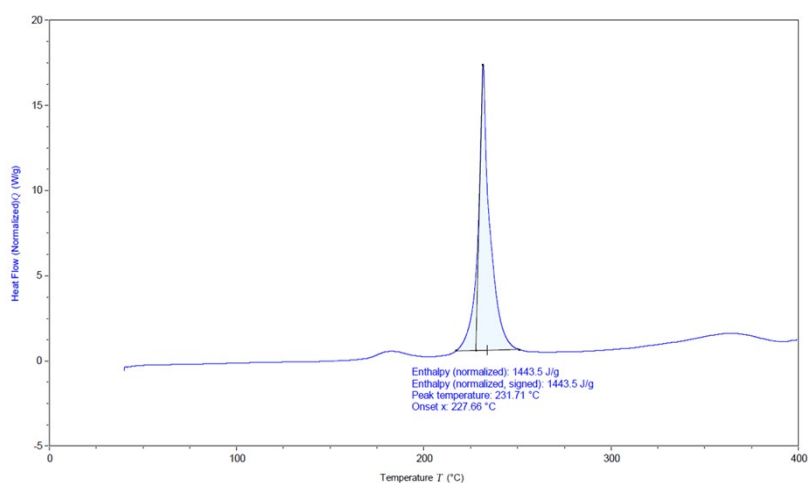

DSC curve of compound **6** at 5 °C min<sup>-1</sup>

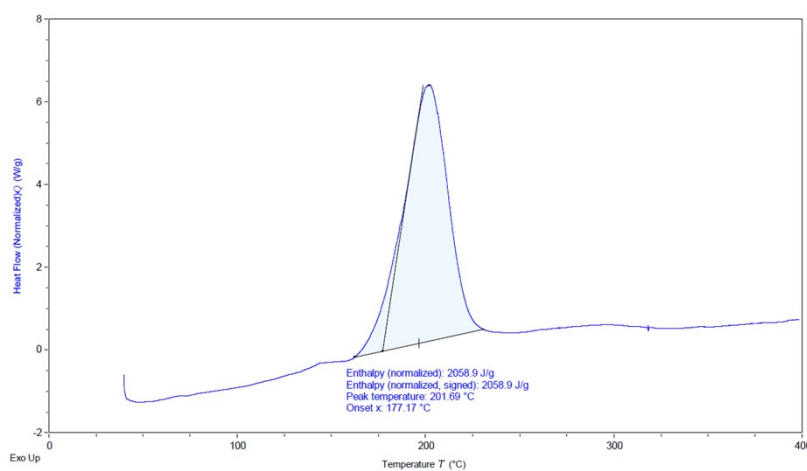

DSC curve of compound **8** at 5 °C min<sup>-1</sup>

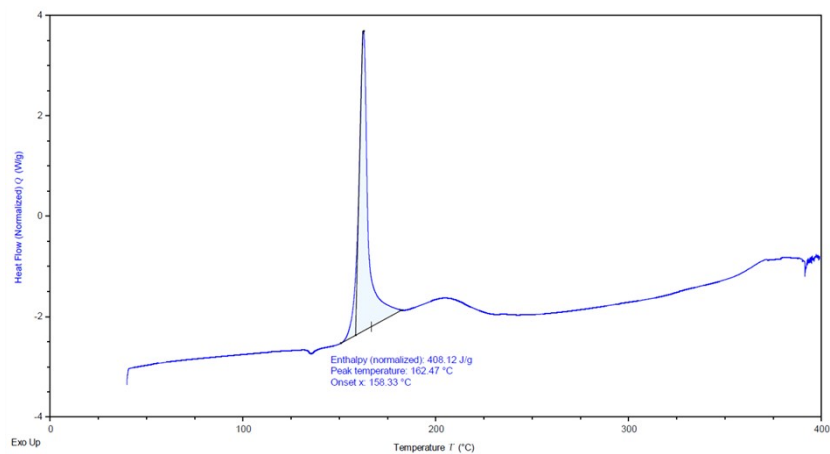

DSC curve of compound **9** at 5 °C min<sup>-1</sup>

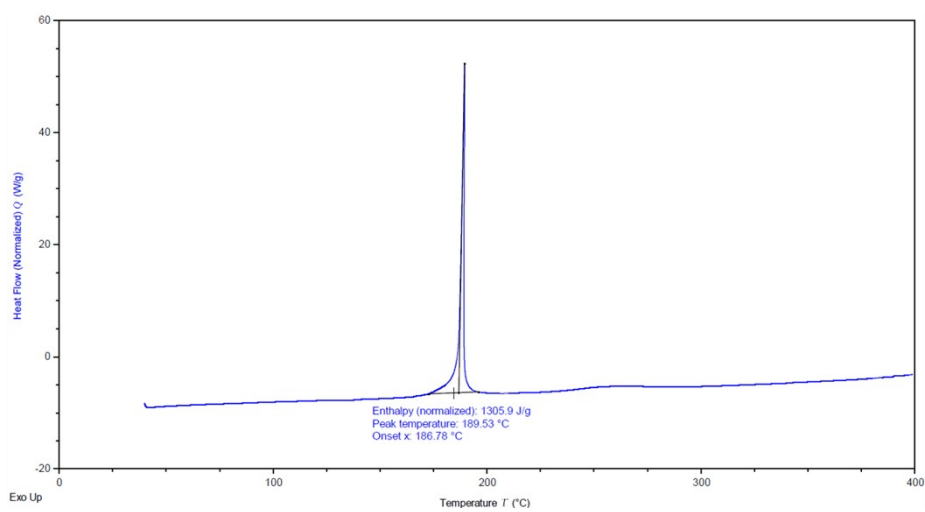

DSC curve of compound **10** at 5 °C min<sup>-1</sup>

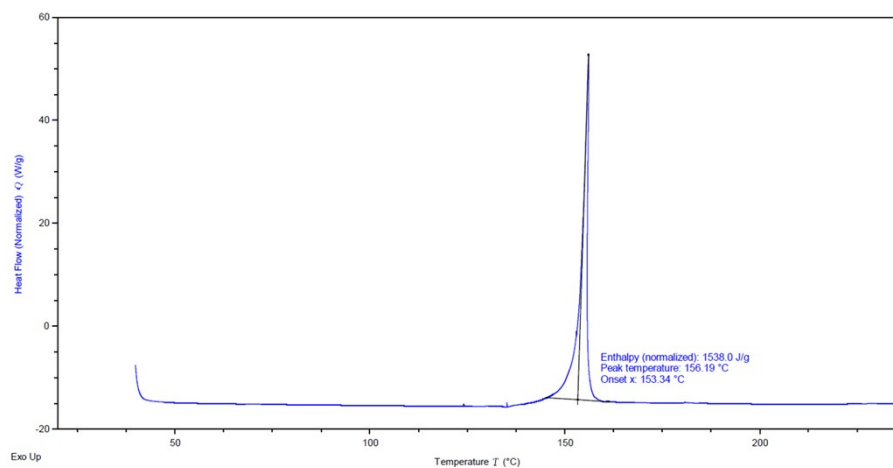

DSC curve of compound **11** at 5 °C min<sup>-1</sup>



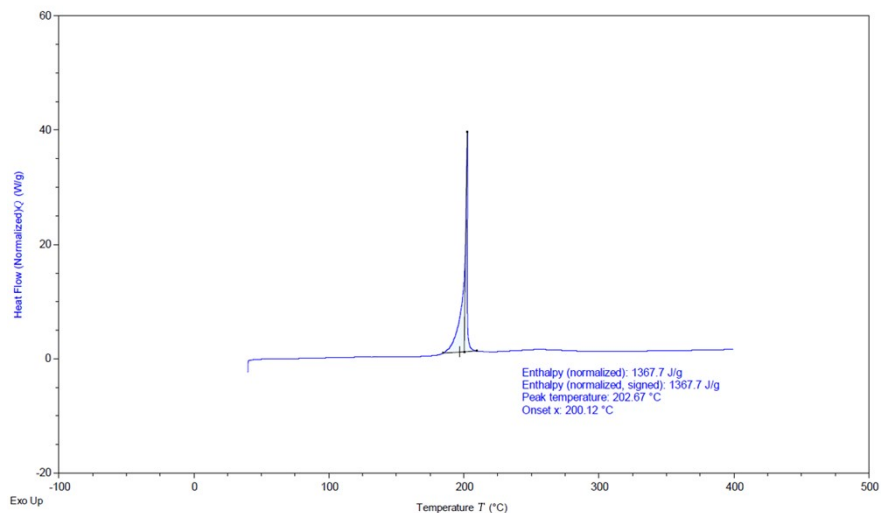

DSC curve of compound **12** at 5 °C min<sup>-1</sup>

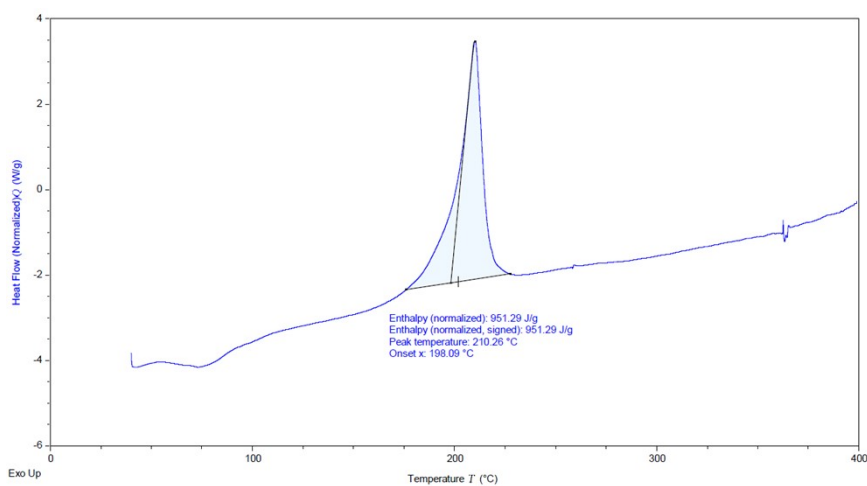

DSC curve of compound **7** at 5 °C min<sup>-1</sup>

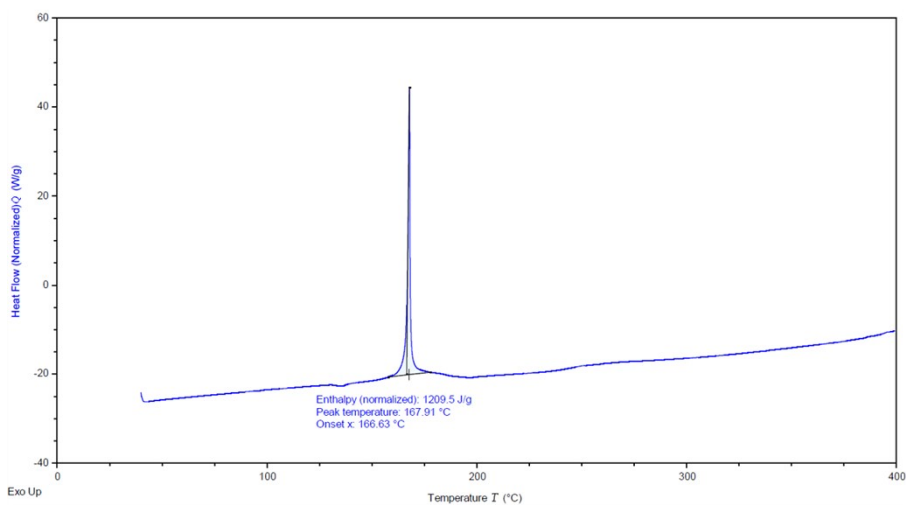

DSC curve of compound **13** at 5 °C min<sup>-1</sup>

## References

- 1 A. Strömberg, O. Gropen and U. Wahlgren, Gaussian basis sets for the fourth-row main group elements, In–Xe, *J. Comput. Chem.*, 1983, **4**, 181-186.
- 2 M. N. Glukhovtsev, A. Pross, M. P. McGrath and L. Radom, Extension of Gaussian-2 (G2) theory to bromine- and iodine-containing molecules: Use of effective core potentials, *J. Chem. Phys.*, 1995, **103**, 1878–1885.
- 3 M. S. Westwell, M. S. Searle, D. J. Wales and D. H. Williams, Empirical Correlations between Thermodynamic Properties and Intermolecular Forces. *J. Am. Chem. Soc.*, 1995, **117**, 5013–5015.
